# Supplementary material for: Reversal of β-Amyloid-Induced Microglial Toxicity In Vitro by Activation of Fpr2/3
Source: PubMed Central journal article supplement (PMC7313167; doi:10.1155/2020/2139192), 2020-06-13

Supplementary Figure 1

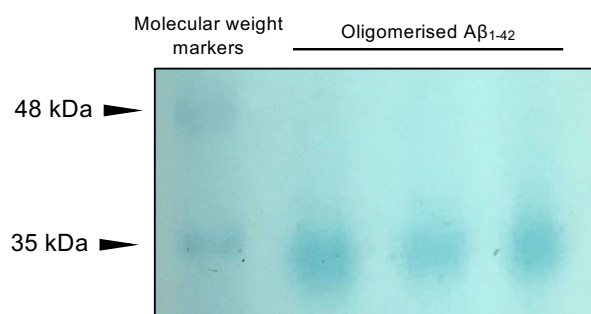

Supplementary Figure 2

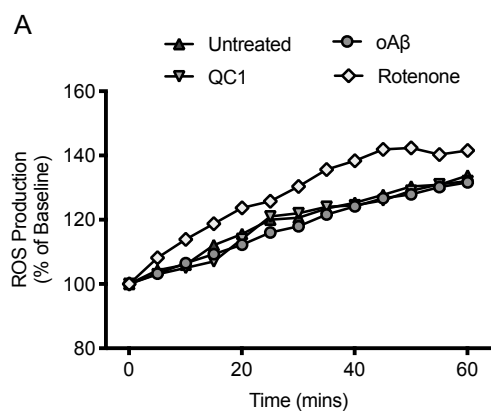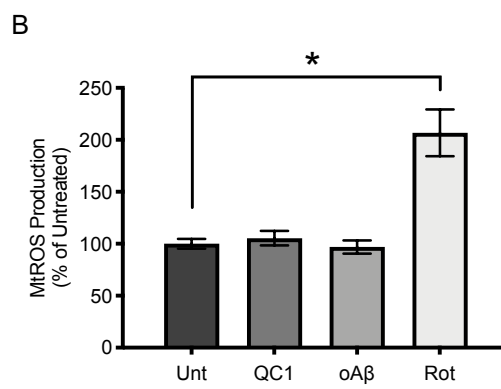

Supplementary Figure 3

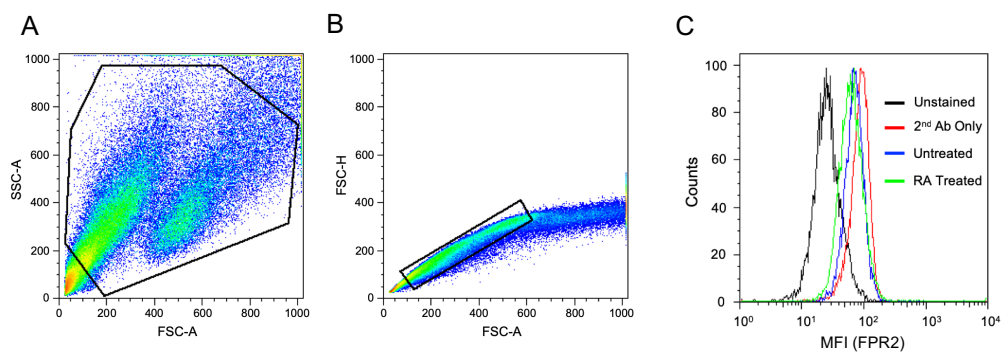

Supplement: 2139192.f1.pdf [file 2139192.f1.pdf]
